# Supplementary material
Source: ML conference proceedings conference paper supplement (https://proceedings.neurips.cc/paper_files/paper/2013/hash/19bc916108fc6938f52cb96f7e087941-Abstract.html)
Supplement: Supplementary file [file 19bc916108fc6938f52cb96f7e087941-Supplemental.zip]

---

# Multiclass Total Variation Clustering (Supplementary Material)

---

**Xavier Bresson**  
University of Lausanne  
Lausanne, Switzerland  
xavier.bresson@unil.ch

**Thomas Laurent**  
Loyola Marymount University  
Los Angeles, CA 90045  
tlaurent@lmu.edu

**David Uminsky**  
University of San Francisco  
San Francisco, CA 94117  
duminsky@usfca.edu

**James H. von Brecht**  
University of California, Los Angeles  
Los Angeles, CA 90095  
jub@math.ucla.edu

## 1 Proofs of Theorems

**Theorem 1.** *If  $f = \mathbf{1}_A$  is the indicator function of a subset  $A \subset V$  then*

$$\frac{\|f\|_{TV}}{\|f - \text{med}_\lambda(f)\|_{1,\lambda}} = \frac{2 \text{Cut}(A, A^c)}{\min\{\lambda|A|, |A^c|\}}.$$

*Proof.* The fact that  $\|f\|_{TV} = 2 \text{Cut}(A, A^c)$  follows directly from the definition of the total variation. Indeed, a straightforward computation shows

$$\|f\|_{TV} = \sum_{\mathbf{x}_i \in A} \sum_{j=1}^N w_{ij} |1 - f(\mathbf{x}_j)| + \sum_{\mathbf{x}_i \in A^c} \sum_{j=1}^N w_{ij} |f(\mathbf{x}_j)| = \sum_{\mathbf{x}_i \in A} \sum_{\mathbf{x}_j \in A^c} w_{ij} + \sum_{\mathbf{x}_i \in A^c} \sum_{\mathbf{x}_j \in A} w_{ij}.$$

Thus  $\|f\|_{TV} = 2 \text{Cut}(A, A^c)$  as  $W$  is symmetric. Let  $B(f) := \|f - \text{med}_\lambda(f)\|_{1,\lambda}$ . To show that  $B(f) = \min\{\lambda|A|, |A^c|\}$ , suppose first that  $\lambda|A| \leq |A^c|$ . This inequality implies  $\lambda|A| \leq N - |A|$ , or equivalently that  $|A| \leq N/(1 + \lambda)$ . Thus  $|A| \leq k := \lfloor N/(1 + \lambda) \rfloor$ , and since  $f = \mathbf{1}_A$  for  $|A| \leq k$  it follows immediately that the  $(k + 1)^{\text{st}}$  largest entry in the range of  $f$  equals zero. Thus  $\text{med}_\lambda(f) = 0$  by definition. A direct computation then yields that  $B(f) = \sum_{i \in V} |f(\mathbf{x}_i)|_\lambda = \lambda|A|$ . In the converse case, the fact that  $|A^c| < \lambda|A|$  implies  $|A| > N/(1 + \lambda) \geq k$ . Thus  $|A| \geq k + 1$  and  $\text{med}_\lambda(f) = 1$ . Direct computation then shows that  $B(f) = \sum_{i \in V} |f(\mathbf{x}_i) - 1|_\lambda = |A^c|$  as claimed.  $\square$

**Lemma 1.** *Let  $h \in \mathbb{R}^N$  and suppose  $v \in \mathbb{R}^N$  satisfies*

$$v(\mathbf{x}_i) \in \begin{cases} \lambda & \text{if } h(\mathbf{x}_i) > 0 \\ [-1, \lambda] & \text{if } h(\mathbf{x}_i) = 0 \\ -1 & \text{if } h(\mathbf{x}_i) < 0. \end{cases} \quad (1)$$

*Then  $v \in \partial\|h\|_{1,\lambda}$ .*

*Proof.* Note that  $|h(\mathbf{x}_i)|_\lambda = v(\mathbf{x}_i)h(\mathbf{x}_i)$  for each  $\mathbf{x}_i$ , so that for arbitrary  $g \in \mathbb{R}^N$  and each  $\mathbf{x}_i$  the inequality

$$|g(\mathbf{x}_i)|_\lambda - |h(\mathbf{x}_i)|_\lambda \geq v(\mathbf{x}_i)(g(\mathbf{x}_i) - h(\mathbf{x}_i))$$

holds. Summing both sides over all  $\mathbf{x}_i \in V$  then gives the claim.  $\square$

**Theorem 2.** *The functions  $B$  and  $T$  are convex. Moreover, given  $f \in \mathbb{R}^N$  the vector  $v \in \mathbb{R}^N$  defined by*

$$v(\mathbf{x}_i) = \begin{cases} \lambda & \text{if } f(\mathbf{x}_i) > \text{med}_\lambda(f) \\ \frac{n^- - \lambda n^+}{n^0} & \text{if } f(\mathbf{x}_i) = \text{med}_\lambda(f) \\ -1 & \text{if } f(\mathbf{x}_i) < \text{med}_\lambda(f) \end{cases} \quad \text{where} \quad \begin{cases} n^0 = |\{\mathbf{x}_i \in V : f(\mathbf{x}_i) = \text{med}_\lambda(f)\}| \\ n^- = |\{\mathbf{x}_i \in V : f(\mathbf{x}_i) < \text{med}_\lambda(f)\}| \\ n^+ = |\{\mathbf{x}_i \in V : f(\mathbf{x}_i) > \text{med}_\lambda(f)\}| \end{cases}$$

*belongs to  $\partial B(f)$ .*

*Proof.* The convexity of  $T(f)$  follows directly from its definition and a straightforward computation using the definition of convexity. Due to the continuity  $B(f)$ , to show convexity it suffices to establish the existence of a subdifferential at every point.

To this end note that  $\text{med}_\lambda(f) \in \text{range}(f)$ , so that in particular  $n^0 \geq 1$  by definition. Let  $1 \leq k := \lfloor N/(1+\lambda) \rfloor < N$  denote that entry of  $f$  so that  $f(\mathbf{x}_k) = \text{med}_\lambda(f)$ . By definition of  $\text{med}_\lambda(f)$  there exist at most  $k$  elements of  $f$  larger than  $\text{med}_\lambda(f)$ , so that  $n^+ \leq k \leq N/(1+\lambda)$ . As  $N = n^- + n^0 + n^+$  this implies  $\frac{\lambda n^+ - n^-}{n^0} \leq 1$ . Similarly there exist at most  $N - (k+1)$  elements of  $f$  smaller than  $\text{med}_\lambda(f)$ , so that  $n^- \leq N - (k+1) \leq N - N/(1+\lambda)$ . The fact that  $N = n^- + n^0 + n^+$  then implies  $\frac{n^- - \lambda n^+}{n^0} \leq \lambda$ . Combining this with the previous inequality yields  $-1 \leq \frac{n^- - \lambda n^+}{n^0} \leq \lambda$ .

Put  $h := f - \text{med}_\lambda(f)\mathbf{1}$ , and note that the vector  $v$  defined above satisfies  $v \in \partial \|h\|_{1,\lambda}$  by the preceding lemma. Thus for any  $g \in \mathbb{R}^N$  it holds that

$$\|g - \text{med}_\lambda(g)\mathbf{1}\|_{1,\lambda} - \|f - \text{med}_\lambda(f)\mathbf{1}\|_{1,\lambda} \geq \langle v, g - f + (\text{med}_\lambda(f) - \text{med}_\lambda(g))\mathbf{1} \rangle$$

by definition of the subdifferential. Note also that  $\langle v, \mathbf{1} \rangle = 0$ , so that in fact

$$B(g) - B(f) = \|g - \text{med}_\lambda(g)\mathbf{1}\|_{1,\lambda} - \|f - \text{med}_\lambda(f)\mathbf{1}\|_{1,\lambda} \geq \langle v, g - f \rangle$$

for  $g \in \mathbb{R}^N$  arbitrary. Thus  $v \in \partial B(f)$  by definition of the subdifferential. In particular  $\partial B(f)$  is always non-empty, so  $B(f)$  is convex.  $\square$

**Theorem 3** (Estimate of the energy descent). *Each of the  $F^k$  belongs to  $C$ , and if  $B_r^k \neq 0$  then*

$$\sum_{r=1}^R \frac{B_r^{k+1}}{B_r^k} (E_r^k - E_r^{k+1}) \geq \frac{\|F^k - F^{k+1}\|^2}{\Delta^k} \quad (2)$$

where  $B_r^k, E_r^k$  stand for  $B(f_r^k), E(f_r^k)$ .

*Proof.* Let  $V^k \in \partial \mathcal{B}^k(F^k)$ . Then by definition of the subdifferential it follows that

$$\mathcal{B}^k(F^{k+1}) \geq \mathcal{B}^k(F^k) + \langle F^{k+1} - F^k, V^k \rangle. \quad (3)$$

As  $F^{k+1} = \text{prox}_{\mathcal{T}^k + \delta_C}(F^k + V^k)$  the definition of the proximal operator implies that  $F^{k+1} \in C$  and that also

$$F^k + V^k - F^{k+1} \in \partial(\mathcal{T}^k + \delta_C)(F^{k+1}).$$

The definition of the subdifferential and the fact that  $\delta_C(F^k) = \delta_C(F^{k+1}) = 0$  then combine to imply

$$\begin{aligned} \mathcal{T}^k(F^k) &\geq \mathcal{T}^k(F^{k+1}) + \langle F^k - F^{k+1}, F^k + V^k - F^{k+1} \rangle \\ &= \mathcal{T}^k(F^{k+1}) + \|F^k - F^{k+1}\|^2 + \langle F^k - F^{k+1}, V^k \rangle \end{aligned} \quad (4)$$

Adding (3) and (4) yields

$$\mathcal{T}^k(F^k) + \mathcal{B}^k(F^{k+1}) \geq \mathcal{T}^k(F^{k+1}) + \mathcal{B}^k(F^k) + \|F^k - F^{k+1}\|^2,$$

or equivalently that  $\mathcal{B}^k(F^{k+1}) \geq \mathcal{T}^k(F^{k+1}) + \|F^k - F^{k+1}\|^2$  since  $\mathcal{B}^k(F^k) = \mathcal{T}^k(F^k)$  by construction. Expanding this last inequality shows

$$\sum_{r=1}^R \frac{\Delta^k}{B_r^k} (E_r^k B_r^{k+1} - T_r^{k+1}) \geq \|F^k - F^{k+1}\|^2,$$

which yields the claim after by  $B_r^{k+1}$  in each term of the summation.  $\square$

## 2 Primal-Dual Formulation

Consider the minimization

$$F^{k+1} := \text{prox}_{\mathcal{T}^k + \delta_C}(G^k).$$

We may write this as the saddle-point problem

$$\min_{u \in \mathbb{R}^{NR}} \max_{p \in \mathbb{R}^{MR}} \langle p, \mathcal{K}u \rangle + G(u) - F^*(p).$$

Here the vector  $u = (f_1, \dots, f_R)^t$  is a “vectorized” version of  $F$  and the matrix  $\mathcal{K}$  denotes the block diagonal matrix

$$\mathcal{K} := \text{blkdiag} \left( \frac{\Delta^k}{B_1^k} K, \dots, \frac{\Delta^k}{B_R^k} K \right)$$

where  $K$  is the gradient matrix of the graph. We define the convex function  $G(u)$  as

$$G(u) := \frac{1}{2} \sum_{r=1}^R \|f_r - g_r^k\|^2 + \delta_C(u),$$

where  $\delta_C$  denotes the barrier function of the convex set  $C$  (either the simplex or simplex with labels) as before. The convex function  $F^*(p)$  denotes the barrier function of the  $l^\infty$  unit ball, so that

$$F^*(p) = \begin{cases} 0 & \text{if } |p_i| \leq 1 \ \forall 1 \leq i \leq MR \\ +\infty & \text{otherwise.} \end{cases}$$

Note also that  $G(u)$  is uniformly convex, in that if  $v \in \partial G(u)$  denotes any subdifferential then for any  $u' \in \mathbb{R}^{NR}$  the inequality

$$G(u') - G(u) \geq \langle v, u' - u \rangle + \frac{1}{2} \|u - u'\|^2$$

holds. We may therefore apply algorithm 2 of [1] with  $\gamma = 1$  with to solve the saddle-point problem. This algorithm consists in the iterations

$$\begin{aligned} p^{n+1} &= \text{prox}_{\sigma^n F^*}(p^n + \sigma^n \mathcal{K} \bar{u}^n) \\ u^{n+1} &= \text{prox}_{\tau^n G}(u^n - \tau^n \mathcal{K}^t p^{n+1}) \\ \theta^n &= \frac{1}{\sqrt{1 + 2\tau^n}} \quad \tau^{n+1} = \theta^n \tau^n \quad \sigma^{n+1} = \sigma^n / \theta^n \\ \bar{u}^{n+1} &= u^{n+1} + \theta^n (u^{n+1} - u^n) \end{aligned}$$

and converges provided the inequality  $\sigma^0 \leq (\tau^0 \|\mathcal{K}\|_2^2)^{-1}$  holds for the initial timesteps. We may compute the inner proximal operators analytically to find

$$(\text{prox}_{\sigma^n F^*}(z))_i = z_i / \max\{1, |z_i|\} \quad \forall 1 \leq i \leq MR,$$

and by completing the square that

$$\text{prox}_{\tau^n G}(z) = \text{proj}_C \left( \frac{z + \tau^n g}{1 + \tau^n} \right),$$

where  $g = (g_1^k, \dots, g_R^k)^t$  denotes  $G^k$  in vectorized form. The inner loop of algorithm 1 then follows by re-writing these computations in matrix form.

## References

- [1] A. Chambolle and T. Pock. A First-Order Primal-Dual Algorithm for Convex Problems with Applications to Imaging. *Journal of Mathematical Imaging and Vision*, 40(1):120–145, 2011.
